# Supplementary material
Source: ML conference proceedings conference paper supplement (https://openreview.net/forum?id=KpKvtdJ6Fd)
Supplement: supplementary_material [file attachment]

## A APPENDIX

### A.1 IMPLEMENTATION DETAILS

This section supplements the pipeline description in Section 5 with additional implementation details that could not be included earlier due to space constraints. *Italicized* text denotes tunable hyperparameters, with sensitivity analyses provided in Sections A.2 and A.4.

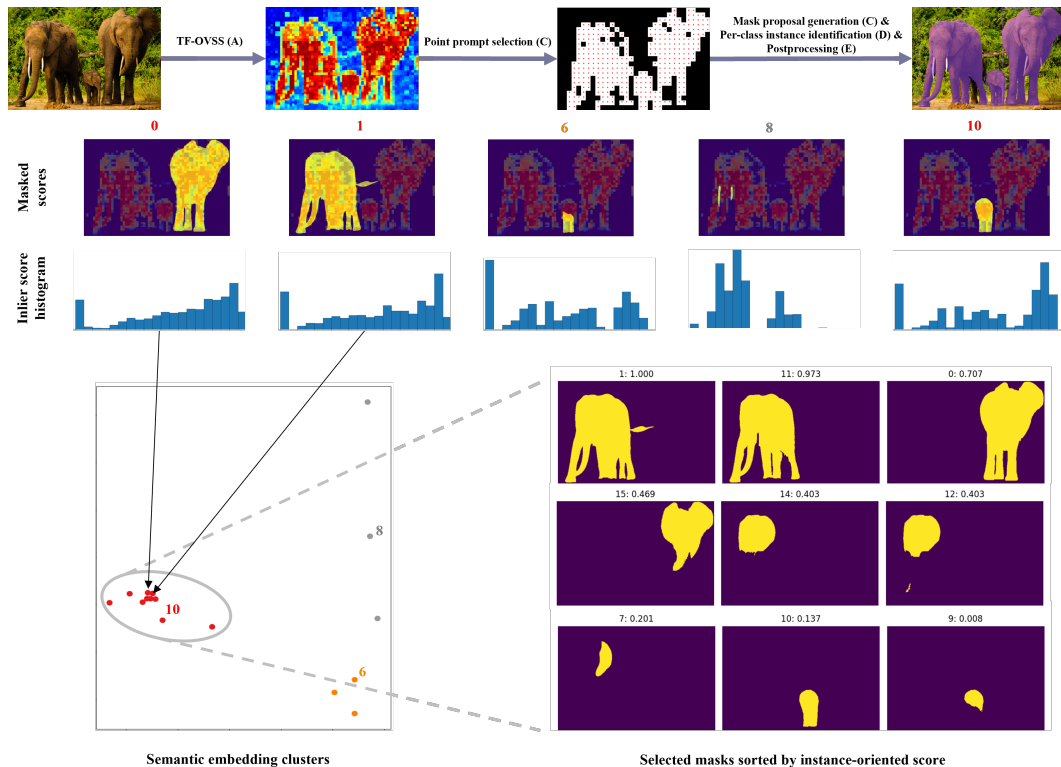

Figure 7: Sample outputs from each step of TIDES. **Top:** Overall pipeline — input image, patch-text semantic alignment scores, foreground patches & selected point prompts for mask generation, and final output. **Middle:** Sample predictions after PSM postprocessing with relaxed criteria and the corresponding histograms. **Bottom:** Semantic embedding clusters (colors denote different clusters). The masks on the right are from the largest cluster, sorted by instance-oriented score. Final postprocessing filters these masks, yielding the outputs shown in the top row.

**Semantic feature extraction (A).** Following standard dual encoder usage, alignment scores between text and image embeddings are computed via cosine similarity, yielding values in  $[-1, 1]$ . The input image is first resized to have a longer side of 512, then we adopt a sliding-window approach with multiple *window scales* and *sizes*, using a stride equal to half the *window size*. Patch-text scores from all windows are upsampled to the original resolution, averaged across scales to form pixel-text scores, and converted back to patch-text scores using the greatest common divisor of patch sizes. This allows TIDES to use a patch size different from that of the dual encoder and improves its ability to capture fine-grained detail.

**In-context class filtering (B).** Sliding-window inference yields multiple  $[\text{CLS}]$  tokens per image. For each window, we compute the similarity between the  $[\text{CLS}]$  token and target class tokens, softmaxed against the *background* token. A class is marked present if any window produces a score greater than that of *background*.

**Point prompt selection and mask proposal generation (C).** Foreground patches are identified by taking the patch-wise product of per-class min-max normalized scores and softmax-normalized scores

against background, followed by thresholding at the *foreground region threshold*. All foreground patches across classes are then collected as a batch and passed to the PSM with a single point prompt at the center of each patch. Using every raw PSM prediction significantly increases computation without improving results, so we relax PSM’s postprocessing by lowering the *stability score threshold* and raising the *box NMS threshold* to retain diverse masks at lower latency (The exact trade-offs are discussed in Section A.4). Among the generated masks, those whose IoU with the corresponding foreground region falls below the *foreground-mask IoU threshold* are discarded.

**Per-class instance identification (D).** For each mask, patch–text alignment scores from its foreground patches are collected, binned into a histogram (*bin size*), and normalized by count to produce fixed-length semantic embeddings. KDE-based clustering is then applied using *bandwidth* and *density threshold* as hyperparameters. Only masks from the largest cluster are kept, filtering out partial or incorrect predictions. The local density of each selected mask is used as its IO score.

**Postprocessing (E).** Overlapping masks are removed by applying NMS with the IO score and an IoU threshold (*NMS threshold*). Each mask is then assigned a semantic score by averaging its min–max normalized patch–text alignment scores, and those below the *semantic score filtering threshold* are discarded to suppress noise.

## A.2 HYPERPARAMETER SENSITIVITY ANALYSIS

Table 4 reports the range of values explored for each hyperparameter along with the corresponding sensitivity of the pipeline, summarized using mean, median, minimum, and maximum AP. The **bolded** value indicates the setting that achieved the highest performance for each hyperparameter.

The search and analysis are conducted using a pipeline built with CS (ViT-B/16) (Li et al., 2025) and EfficientViTSAM (XL1) (Sun et al., 2024) on a subset of the MS COCO 2017 validation set (Lin et al., 2014), selected to include at least three instances of each of the 80 categories. Empirically, the best-performing configurations on this subset are reasonably consistent with those observed on the full validation set of 5,000 samples.

Table 4: Impact of hyperparameter choices on performance. [a:b:c] denotes a range from a to c (inclusive) with step size b. The **bolded** choices indicates the one that led to the best performance.

| Hyperparameter                            | Stage | Choices<br>(selected)               | AP      |             |         |      |
|-------------------------------------------|-------|-------------------------------------|---------|-------------|---------|------|
|                                           |       |                                     | Minimum | Median      | Maximum | Mean |
| <i>window scales</i>                      | A     | 1, 2, <b>3</b>                      |         |             |         |      |
| <i>window sizes</i>                       | A     | 36, <b>112</b> , 168, 224, 336, 448 | 14.8    | 25.9        | 30.2    | 25.3 |
| <i>PSM box IOU threshold</i>              | C     | Section A.4 ( <b>0.80</b> )         | 26.6    | 28.2        | 30.1    | 28.0 |
| <i>PSM stability score threshold</i>      | C     | Section A.4 ( <b>0.90</b> )         |         |             |         |      |
| <i>foreground region threshold</i>        | C     | [0.10:0.10:0.90] ( <b>0.10</b> )    | 22.8    | <b>30.2</b> | 30.4    | 29.3 |
| <i>foreground-mask IoU threshold</i>      | C     | [0.10:0.10:0.90] ( <b>0.20</b> )    | 25.3    | 29.4        | 30.7    | 29.0 |
| <i>histogram bin size</i>                 | D     | <b>0.025</b> , 0.050, 0.100         | 10.7    | 21.9        | 31.3    | 21.6 |
| <i>clustering bandwidth</i>               | D     | [0.50:0.20:1.50] ( <b>0.50</b> )    | 10.6    | 22.1        | 30.3    | 21.9 |
| <i>clustering density threshold</i>       | D     | 0.75, 0.80, 0.85, <b>0.90</b>       | 11.6    | 22.4        | 31.6    | 22.1 |
| <i>NMS threshold</i>                      | E     | [0.10:0.10:0.90] ( <b>0.70</b> )    | 27.5    | 29.6        | 30.4    | 29.5 |
| <i>semantic score filtering threshold</i> | E     | [0.10:0.10:0.90] ( <b>0.10</b> )    | 1.6     | 29.1        | 30.3    | 23.3 |

## A.3 ADDITIONAL STUDIES ON PSM BEHAVIOR AND THE IMPACT OF IO SCORING

**Per-Prompt Prediction Distributions of Different PSMs.** Figure 8 presents the same subplots as Figure 3—*All Predictions*, *Best IoU*, and *Best Score*—but includes two additional PSMs: MobileSAM (Tiny) (Zhang & Jiao, 2023) and SAM2.1 (Large) (Ravi et al., 2024). The distributions from these additional models are consistent with the original three, confirming that the findings in Section 3.2 generalize across other PSMs.

Out of the 80 COCO classes, the following 18 are considered *non-uniform*: person, bicycle, car, motorcycle, bus, airplane, train, truck, boat, hot dog, chair, couch, potted plant, bed, dining table, bench, skis, and book.

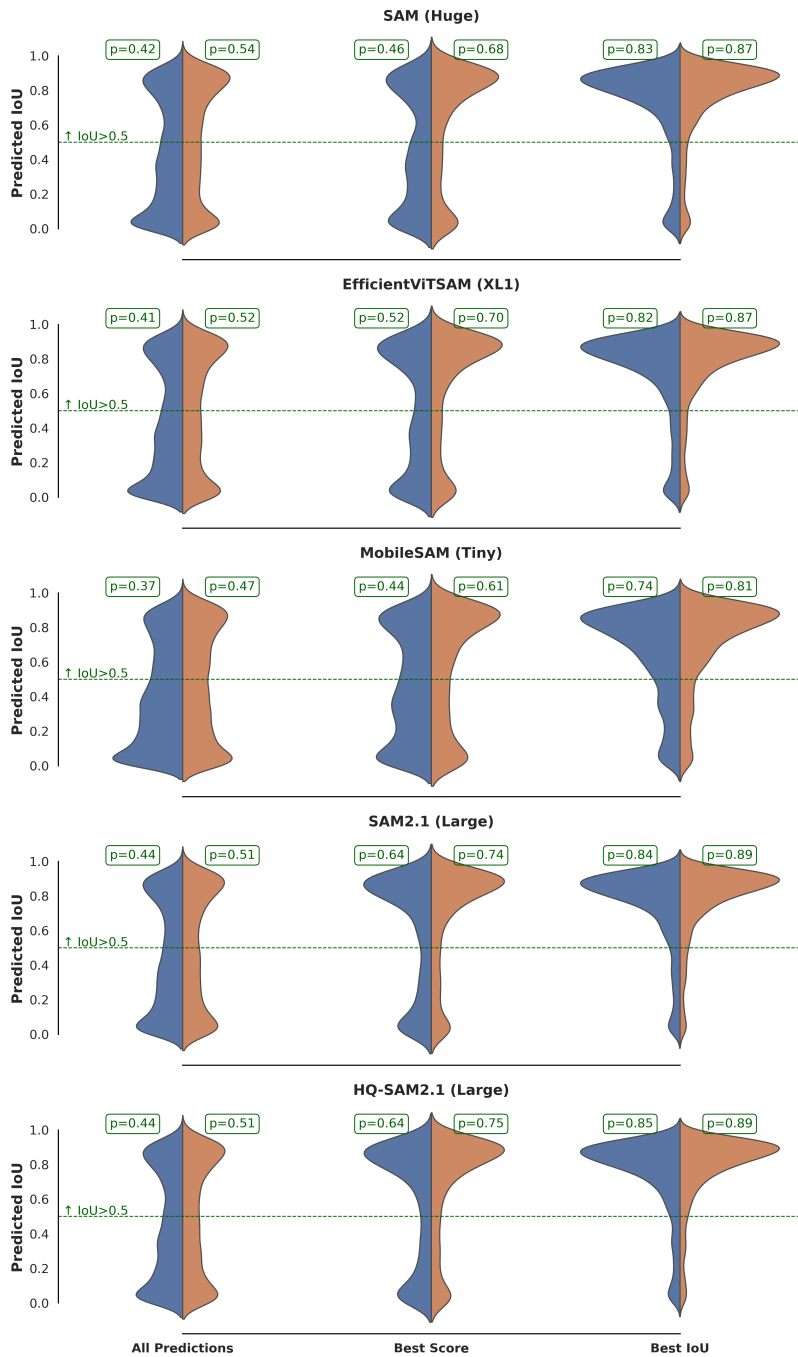

Figure 8: Per-point prediction distributions of different PSMs across IoU values for *uniform* and *non-uniform* objects ( $p$  indicates percentage of predictions with IoU > 0.5).

**Effect of Different Scoring Configurations on Per-Instance Distributions.** To illustrate the effect of each assumption described in Section 4, we presents *Best Score* distributions under different point sampling and scoring configurations using the five PSMs.

1. *Random & Best Raw Score*:  $n$  random point prompts within GT masks & original scores.
2. *Random & Best Per-Instance IO Score*:  $n$  random point prompts within GT masks & IO scores from instance-level clustering ( $n \times m$  embeddings).

3. *TF-OVSS & Best Per-Instance IO Score*:  $n$  high-score prompts selected from foreground regions identified with CS (Li et al., 2025) & IO scores from instance-level clustering ( $n \times m$  embeddings).
4. *TF-OVSS & Best Per-Image IO Score*:  $n$  high-score prompts selected from foreground regions identified with CS (Li et al., 2025) & IO scores from image-level clustering ( $n \times m$  embeddings).

Please note that, since the primary focus of this study is to demonstrate the implicit bias of each PSM and the impact of the new scoring method, we consider only a subset of the MS COCO 2017 validation set (Lin et al., 2014), consisting of 500 samples. Among these, we include only the instances for which CS (Li et al., 2025) successfully identified  $n = 5$  point prompts. In other words, the PSM tuned for TIDES pipeline may exhibit a slightly different distribution compared to this optimal setting, due to the inclusion of PSM’s postprocessing logic under a relaxed configuration (Section A.4).

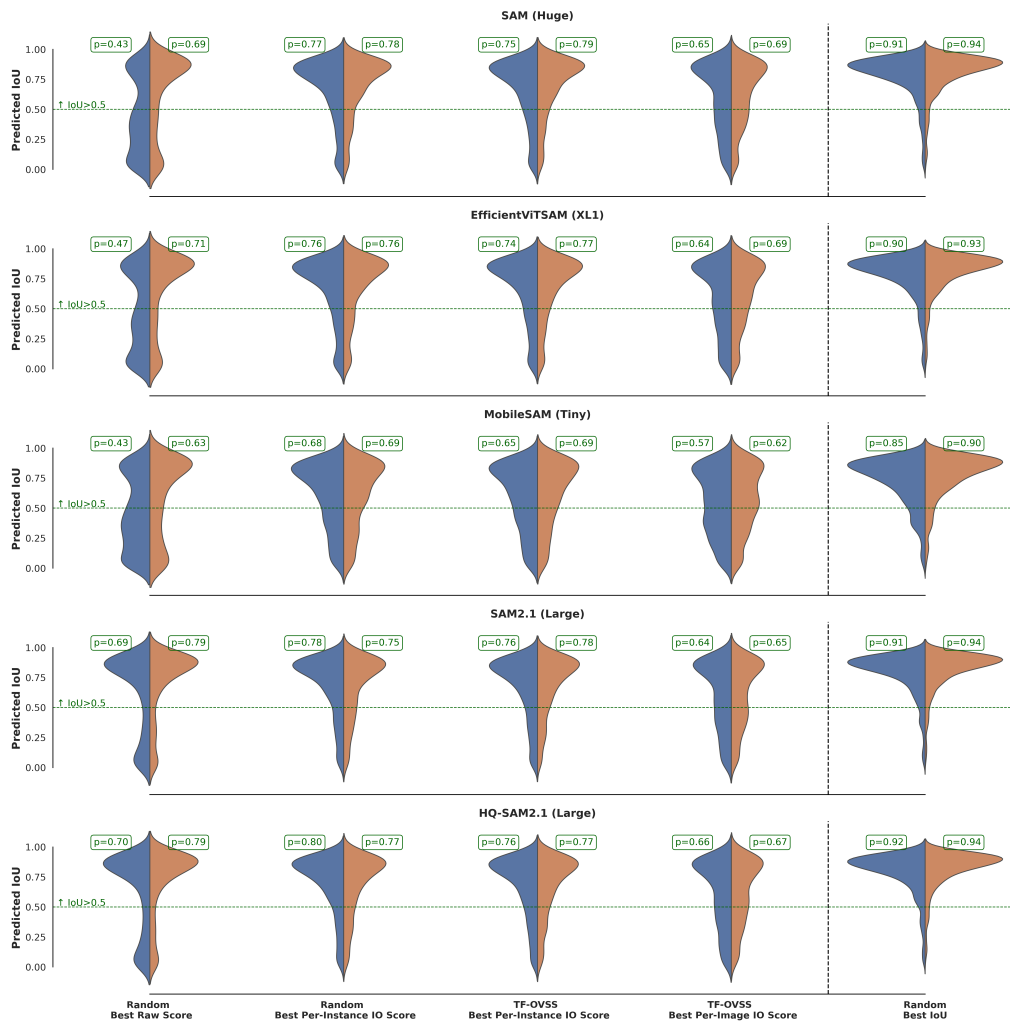

Figure 9: Effect of different point sampling and scoring configurations on the distribution of *Best Score* predictions across PSMs for *uniform* and *non-uniform* objects ( $p$  indicates percentage of predictions with IoU > 0.5).

Figure 9 reveals that the changes in distributions resulting from different sampling and scoring configurations exhibit similar patterns across PSMs. Therefore, we describe the identified pattern based on the SAM (Huge) (Kirillov et al., 2023) graph.

From *Random & Best Raw Score* to *Random & Best Per-Instance IO Score*, we observe a 9% increase for *uniform* objects and a substantial 33% increase for *non-uniform* objects, resulting in 78% and 77% of predictions above  $\text{IoU} > 0.5$  threshold, respectively. Results from *TF-OVSS & Best Per-Instance IO Score* remain comparable, suggesting that point prompts derived from high patch-text alignment regions do not introduce semantic bias.

When predictions are aggregated across multiple instances (*TF-OVSS & Best Per-Image IO Score*), we observe a 10% decrease for both *uniform* and *non-uniform* objects. Nonetheless, the resulting distributions remain skewed toward higher IoU values (69% for *uniform* and 65% for *non-uniform*), indicating that the misalignment observed in *Random & Best Raw Score* for *non-uniform* objects has been substantially mitigated.

Figure 9 also includes the distributions of *Random & Best IoU* derived from random point prompts with raw scores. The high values of 94% (*uniform*) and 91% (*non-uniform*) represent empirical upper bounds, highlighting the potential for further gains through improved scoring.

#### A.4 INFERENCE TIME ANALYSIS

In this section, we analyze TIDES’ behavior with respect to PSM postprocessing configurations, aiming to identify the setup that yields the best TIDES performance in practical scenarios.

- *PSM default*: the default postprocessing configuration.
  - *PSM stability score threshold* = 0.95, *PSM box NMS threshold* = 0.70
- *LooseNMS*: only the NMS filtering configuration relaxed.
  - *PSM stability score threshold* = 0.95, *PSM box NMS threshold* = 0.90
- *Balanced*: both the NMS and stability score filtering configurations slightly relaxed.
  - *PSM stability score threshold* = 0.80, *PSM box NMS threshold* = 0.90
- *MinFilter*: both the NMS and stability score filtering configurations relaxed to the extreme.
  - *PSM stability score threshold* = 0.60, *PSM box NMS threshold* = 1.00

Inference latency and corresponding instance segmentation performance are measured by running the pipeline on the same subsampled images used for hyperparameter tuning in Section A.2, but with only the ground-truth classes as the vocabulary. All experiments are performed on a machine equipped with an Intel Core i9-9940X CPU @ 3.30GHz, 125 GB RAM, and a single NVIDIA Quadro RTX 6000 GPU with 24 GB of memory. We report the mean and 95% confidence interval in seconds for the latency, and the AP value for the segmentation performance.

Table 5: Inference latency (in seconds) and segmentation performance (AP) under different PSM configurations. The *Balanced* setting shows a notable performance gain with a moderate increase in latency, and is therefore selected as the default for TIDES.

| PSM               | Params. | Inference latency (s) ↓ / segmentation performance (AP) ↑ |                    |                    |                    |
|-------------------|---------|-----------------------------------------------------------|--------------------|--------------------|--------------------|
|                   |         | <i>PSM default</i>                                        | <i>LooseNMS</i>    | <i>Balanced</i>    | <i>MinFilter</i>   |
| SAM (Base)        | 93.7M   | 2.05 ± 0.31 / 21.1                                        | 2.03 ± 0.33 / 21.4 | 3.51 ± 0.63 / 22.6 | 5.59 ± 0.99 / 24.7 |
| SAM (Huge)        | 636.2M  | 3.01 ± 0.40 / 26.9                                        | 3.15 ± 0.42 / 26.8 | 4.48 ± 0.68 / 26.7 | 6.20 ± 1.04 / 27.3 |
| E-SAM (L0)        | 34.8M   | 1.21 ± 0.06 / 10.5                                        | 1.22 ± 0.07 / 10.0 | 1.28 ± 0.08 / 13.4 | 1.30 ± 0.08 / 13.5 |
| E-SAM (XL1)       | 203.3M  | 1.94 ± 0.14 / 26.7                                        | 2.03 ± 0.15 / 26.6 | 2.72 ± 0.25 / 30.1 | 3.54 ± 0.37 / 29.2 |
| M-SAM (Tiny)      | 10.1M   | 1.98 ± 0.23 / 21.9                                        | 2.07 ± 0.26 / 22.1 | 3.54 ± 0.55 / 25.0 | 4.96 ± 0.92 / 24.5 |
| SAM2.1 (Base+)    | 80.8M   | 1.09 ± 0.05 / 4.8                                         | 1.10 ± 0.04 / 5.2  | 1.11 ± 0.04 / 7.9  | 1.12 ± 0.04 / 8.8  |
| SAM2.1 (Large)    | 224.4M  | 1.25 ± 0.05 / 10.6                                        | 1.23 ± 0.05 / 10.5 | 1.36 ± 0.06 / 20.6 | 1.55 ± 0.08 / 19.7 |
| HQ-SAM2.1 (Large) | 224.7M  | 1.74 ± 0.06 / 17.8                                        | 1.74 ± 0.06 / 17.8 | 1.79 ± 0.07 / 20.4 | 1.97 ± 0.09 / 20.5 |
| Average           | -       | 1.78 / 17.5                                               | 1.82 / 17.6        | 2.47 / 20.8        | 3.28 / 21.0        |

As shown in Table 5, TIDES inference time closely correlates with both the size and architectural design of the underlying PSM. Models optimized for speed, such as E-SAM (L0) and M-SAM (Tiny), achieve lower latency with fewer parameters compared to their respective baselines, SAM (Base) and SAM (Huge). Despite having more parameters, SAM2.1 also exhibits improved latency over SAM, owing to its redesigned decoder, optimized prompt encoding, and reduced redundant computation.

As expected, inference latency increases as the filtering conditions are relaxed, due to the higher number of masks processed. Segmentation performance also follows the same pattern, increasing as the filtering conditions are relaxed. However, the performance gain from *Balanced* to *MinFilter* is minimal, showing that a *PSM stability score threshold* of 0.80 and a *PSM box NMS threshold* of 0.90 provide the most return in performance on the investment in inference latency. Therefore, we select this setting as the default for our TIDES pipeline.

#### A.5 RESOURCE CONSUMPTION ANALYSIS

To better understand which factors drive resource consumption, we conduct two studies on computational efficiency and memory usage. For all experiments, we evaluate TIDES configured with CS (ViT-B/16) and SAM (Base) on a subset of the LVIS dataset (Gupta et al., 2019). We report per-sample peak GPU memory usage and latency as mean  $\pm$  standard deviation.

**Sensitivity to the Number of Classes.** Table 6 summarizes how peak GPU memory and latency scale with the number of classes. Both metrics grow steadily as the number of classes increases, showing that TIDES is sensitive to this factor.

Table 6: Sensitivity of TIDES to the number of classes.

| # of Classes         | 1             | 25             | 50             | 75              | 100              |
|----------------------|---------------|----------------|----------------|-----------------|------------------|
| Peak GPU Memory (GB) | $3.3 \pm 1.9$ | $4.1 \pm 0.7$  | $5.5 \pm 0.9$  | $7.5 \pm 1.9$   | $8.7 \pm 2.2$    |
| Latency (sec)        | $3.0 \pm 0.1$ | $43.8 \pm 2.1$ | $85.8 \pm 4.1$ | $128.7 \pm 4.6$ | $166.6 \pm 12.2$ |

**Sensitivity to the Number of Instances.** Table 7 shows how resource usage changes with respect to the average number of instances per image. Here we use a 50-class subset of LVIS. While peak GPU memory grows slightly, latency remains largely unaffected.

Table 7: Sensitivity of TIDES to the number of instances per image.

| Avg. Instances/Image | 2              | 4              | 6              | 8              |
|----------------------|----------------|----------------|----------------|----------------|
| Peak GPU Memory (GB) | $5.5 \pm 0.7$  | $5.3 \pm 0.5$  | $5.9 \pm 0.6$  | $6.3 \pm 0.9$  |
| Latency (sec)        | $84.5 \pm 4.2$ | $80.2 \pm 4.1$ | $84.9 \pm 3.5$ | $87.3 \pm 8.4$ |

Improving scalability with respect to both class count and instance density remains an important area to work on for making TIDES more practical and broadly deployable.

## A.6 ADDITIONAL QUANTITATIVE ANALYSIS

To further back up our findings in Section 6, we evaluate the performance of TIDES designed with MobileSAM (Zhang & Jiao, 2023) and SAM2 (Ravi et al., 2024). In addition, we evaluate TIDES linked with smaller version of SAM (Kirillov et al., 2023) (Base) and SAM2.1 (Base+). Our complete evaluation, summarized in Table 8, further confirms that our IO scoring consistently improves performance over raw scores. The evaluation setting is identical to that described in Section 6.

Table 8: Zero-shot TF-OVIS performance of TIDES with different TF-OVSS and PSM combinations on MS COCO 2017. Each includes two variants: Raw and IO scores. ‘‘SS perf.’’ denotes the average TF-OVSS performance on standard benchmarks. ‘‘SOTA’’ refers to Zip (Shi & Yang, 2024).

| TF-OVSS<br>(SS Perf.) | PSM               | Score | AR <sub>10</sub> | AR <sub>100</sub> | AP <sub>s</sub> | AP <sub>m</sub> | AP <sub>l</sub> | AP <sub>75</sub> | AP <sub>50</sub> | AP <sub>↑</sub> | vs. Naive | vs. SOTA<br>(11.8) |
|-----------------------|-------------------|-------|------------------|-------------------|-----------------|-----------------|-----------------|------------------|------------------|-----------------|-----------|--------------------|
| CS<br>(37.2)          | SAM<br>(Base)     | Raw   | 34.9             | 36.1              | 4.6             | 22.4            | 34.4            | 12.3             | 21.7             | 13.0            |           |                    |
|                       |                   | IO    | 34.1             | 35.0              | 4.6             | 21.5            | 34.1            | 14.2             | 24.8             | 15.2            | +2.2      | +3.4               |
|                       | SAM<br>(Huge)     | Raw   | 40.0             | 41.7              | 5.7             | 25.9            | 37.4            | 14.1             | 22.9             | 14.6            |           |                    |
|                       |                   | IO    | 39.8             | 40.9              | 6.7             | 27.6            | 39.2            | 18.7             | 29.4             | 19.2            | +4.6      | +7.4               |
|                       | E-SAM<br>(L0)     | Raw   | 35.6             | 36.3              | 5.3             | 24.1            | 36.5            | 14.6             | 25.2             | 15.6            |           |                    |
|                       |                   | IO    | 35.5             | 36.1              | 5.4             | 24.4            | 37.5            | 17.5             | 29.3             | 18.5            | +2.9      | +6.7               |
|                       | E-SAM<br>(XL1)    | Raw   | 39.4             | 40.3              | 6.4             | 27.9            | 40.3            | 17.8             | 27.3             | 18.2            |           |                    |
|                       |                   | IO    | 38.5             | 39.3              | 6.9             | 27.6            | 40.8            | 20.5             | 31.2             | 21.0            | +2.8      | +9.2               |
|                       | M-SAM<br>(Tiny)   | Raw   | 34.9             | 35.9              | 5.2             | 20.2            | 31.4            | 10.8             | 21.8             | 12.4            |           |                    |
|                       |                   | IO    | 34.3             | 35.0              | 5.8             | 21.9            | 32.8            | 13.6             | 26.5             | 15.5            | +3.1      | +3.7               |
|                       | SAM2.1<br>(Base+) | Raw   | 5.8              | 5.8               | 0.0             | 0.6             | 13.3            | 5.5              | 6.5              | 5.4             |           |                    |
|                       |                   | IO    | 5.8              | 5.8               | 0.0             | 0.6             | 13.2            | 5.4              | 6.5              | 5.4             | 0.0       | -6.4               |
|                       | SAM2.1<br>(Large) | Raw   | 19.7             | 19.7              | 1.5             | 13.2            | 30.9            | 14.0             | 20.5             | 14.1            |           |                    |
|                       |                   | IO    | 20.2             | 20.2              | 1.5             | 13.9            | 32.1            | 14.5             | 21.2             | 14.6            | +0.5      | +2.8               |
| HQ-SAM2.1<br>(Large)  | Raw               | 25.6  | 25.7             | 3.4               | 15.4            | 31.8            | 12.3            | 25.4             | 14.6             |                 |           |                    |
|                       | IO                | 25.9  | 25.9             | 3.5               | 15.8            | 31.8            | 12.5            | 26.3             | 15.0             | +0.4            | +3.2      |                    |
| SCLIP<br>(39.1)       | SAM<br>(Base)     | Raw   | 28.7             | 30.9              | 1.5             | 12.9            | 34.5            | 8.9              | 16.1             | 9.6             |           |                    |
|                       |                   | IO    | 29.9             | 32.0              | 1.7             | 12.5            | 33.3            | 10.8             | 20.8             | 12.4            | +2.8      | +0.6               |
|                       | SAM<br>(Huge)     | Raw   | 36.4             | 39.2              | 2.6             | 20.9            | 40.8            | 13.2             | 20.9             | 13.7            |           |                    |
|                       |                   | IO    | 35.8             | 37.9              | 3.0             | 21.6            | 41.5            | 17.6             | 26.7             | 18.2            | +4.5      | +6.4               |
|                       | E-SAM<br>(L0)     | Raw   | 29.5             | 30.6              | 2.0             | 15.1            | 37.3            | 12.0             | 21.0             | 13.0            |           |                    |
|                       |                   | IO    | 29.4             | 30.2              | 2.3             | 15.3            | 36.1            | 15.2             | 25.2             | 16.3            | +3.3      | +4.5               |
|                       | E-SAM<br>(XL1)    | Raw   | 35.2             | 36.8              | 3.1             | 22.7            | 40.9            | 15.2             | 23.4             | 15.7            |           |                    |
|                       |                   | IO    | 34.3             | 35.5              | 3.4             | 23.2            | 41.8            | 18.9             | 28.1             | 19.4            | +3.7      | +7.6               |
|                       | M-SAM<br>(Tiny)   | Raw   | 31.8             | 33.4              | 2.2             | 15.9            | 33.9            | 9.8              | 19.8             | 11.5            |           |                    |
|                       |                   | IO    | 31.1             | 32.4              | 2.6             | 16.8            | 34.7            | 12.9             | 24.6             | 14.7            | +3.2      | +2.9               |
|                       | SAM2.1<br>(Base+) | Raw   | 6.4              | 6.4               | 0.0             | 0.7             | 13.9            | 5.8              | 7.1              | 5.9             |           |                    |
|                       |                   | IO    | 6.4              | 6.4               | 0.0             | 0.7             | 13.9            | 5.9              | 7.1              | 5.9             | 0.0       | -5.9               |
|                       | SAM2.1<br>(Large) | Raw   | 19.0             | 19.0              | 0.8             | 10.2            | 32.1            | 13.6             | 20.0             | 13.6            |           |                    |
|                       |                   | IO    | 18.8             | 18.8              | 0.8             | 10.3            | 32.0            | 13.7             | 20.1             | 13.9            | +0.3      | +2.1               |
| HQ-SAM2.1<br>(Large)  | Raw               | 22.2  | 22.2             | 1.6               | 12.1            | 30.4            | 11.8            | 22.4             | 13.3             |                 |           |                    |
|                       | IO                | 21.8  | 21.8             | 1.7               | 12.2            | 30.5            | 12.4            | 23.1             | 13.9             | +0.6            | +2.1      |                    |
| SC-CLIP<br>(43.9)     | SAM<br>(Base)     | Raw   | 33.2             | 35.1              | 3.3             | 20.2            | 35.7            | 11.7             | 21.2             | 12.6            |           |                    |
|                       |                   | IO    | 32.0             | 33.3              | 3.0             | 18.9            | 35.0            | 13.9             | 24.2             | 15.0            | +2.4      | +3.2               |
|                       | SAM<br>(Huge)     | Raw   | 40.0             | 42.5              | 4.3             | 25.1            | 40.4            | 14.6             | 23.7             | 15.3            |           |                    |
|                       |                   | IO    | 38.2             | 40.0              | 4.7             | 25.1            | 39.6            | 18.5             | 28.8             | 19.1            | +3.8      | +7.3               |
|                       | E-SAM<br>(L0)     | Raw   | 34.0             | 35.0              | 4.0             | 22.1            | 38.4            | 14.8             | 25.2             | 15.7            |           |                    |
|                       |                   | IO    | 31.7             | 32.4              | 4.0             | 20.4            | 36.0            | 16.1             | 27.0             | 17.2            | +1.5      | +5.4               |
|                       | E-SAM<br>(XL1)    | Raw   | 38.6             | 40.1              | 5.1             | 26.8            | 40.6            | 16.8             | 26.0             | 17.4            |           |                    |
|                       |                   | IO    | 37.1             | 38.2              | 5.5             | 26.5            | 40.0            | 20.1             | 30.2             | 20.6            | +3.2      | +8.8               |
|                       | M-SAM<br>(Tiny)   | Raw   | 34.9             | 36.4              | 4.0             | 19.5            | 33.7            | 11.2             | 22.7             | 13.0            |           |                    |
|                       |                   | IO    | 33.4             | 34.5              | 4.2             | 19.8            | 33.2            | 13.6             | 26.5             | 15.6            | +2.6      | +3.8               |
|                       | SAM2.1<br>(Base+) | Raw   | 5.8              | 5.8               | 0.0             | 0.6             | 13.3            | 5.5              | 6.5              | 5.4             |           |                    |
|                       |                   | IO    | 5.8              | 5.8               | 0.0             | 0.6             | 13.2            | 5.4              | 6.5              | 5.4             | 0.0       | -6.4               |
|                       | SAM2.1<br>(Large) | Raw   | 19.5             | 19.5              | 1.1             | 12.6            | 31.7            | 14.3             | 20.5             | 14.2            |           |                    |
|                       |                   | IO    | 19.4             | 19.4              | 1.1             | 12.5            | 32.1            | 14.5             | 20.7             | 14.4            | +0.2      | +2.6               |
| HQ-SAM2.1<br>(Large)  | Raw               | 23.3  | 23.3             | 2.1               | 14.4            | 30.8            | 12.2            | 23.5             | 14.0             |                 |           |                    |
|                       | IO                | 23.0  | 23.0             | 2.2               | 14.9            | 31.5            | 13.2            | 24.5             | 14.8             | +0.8            | +3.0      |                    |

## 1026 A.7 ADDITIAONL QUALITATIVE ANALYSIS

### 1027 A.7.1 TIDES WITH OPTIMAL SUBCOMPONENT CONFIGURATIONS

1028 To complement the ablation study in Section 7, we present qualitative results of TIDES (CS (ViT-B/16)  
1029 & E-SAM (XL1)) configured with the optimal alternative for each subcomponent (Figures 10, 11,  
1030 and 12). The figures illustrate how improvements to individual subcomponents contribute to overall  
1031 performance gains, while also providing insights into common failure cases:  
1032  
1033

- 1034 1. Instance label incompleteness in ground truth (false negatives):  
1035 Not all instances in the COCO images are labeled, leading to potential underestimation of  
1036 TIDES’ performance in quantitative metrics. TIDES often detects more instances than are  
1037 annotated, particularly in cluttered scenes (e.g., samples 181666, 238866). While these  
1038 predictions are semantically valid, they reduce measured precision. For example, a shelf with  
1039 multiple items labeled as one object may be segmented by TIDES into multiple instances.  
1040
- 1041 2. Non-uniform objects and over-segmentation:  
1042 Objects with distinct subcomponents (e.g., sofas with separate cushions or a person with  
1043 accessories) may be over-segmented due to their multi-component appearance. For instance,  
1044 in sample 219578, each sofa cushion is predicted as a separate instance.  
1045
- 1046 3. Class filtering and confusion:  
1047 In the absence of ground-truth semantic supervision, in-context class filtering can produce  
1048 false positives or misclassifications. For example, in sample 184791, an unlabeled large jug  
1049 is detected as a bowl.  
1050
- 1051 4. Small object detection:  
1052 While not a primary bottleneck, TIDES shows lower accuracy on small objects, consistent  
1053 with trends observed in other segmentation models (Table 1).

1054 Throughout our experiments with Zip, we observed that its performance on multi-instance or complex  
1055 scenes falls significantly below a usable level. High false positives caused by confusion between  
1056 foreground and background (e.g., samples 238866, 181666) indicate that the main issues stem from  
1057 an inability to distinguish foreground from background and to correctly identify in-context classes.  
1058 This highlights the stability and advancements introduced by TIDES.

1059 It is also worth noting that these failures arise from fundamental limitations in Zip’s design. Zip  
1060 focuses on detecting boundary pixels to group non-boundary pixels into instances, which results in  
1061 aggressive discarding of pixels near instance boundaries. Recovery of these pixels relies on SAM,  
1062 introducing additional instability in complex scenarios.

1063  
1064  
1065  
1066  
1067  
1068  
1069  
1070  
1071  
1072  
1073  
1074  
1075  
1076  
1077  
1078  
1079



| Sample ID | 181666          | 289393 | 463730 |
|-----------|-----------------|--------|--------|
| 1134      |                 |        |        |
| 1135      |                 |        |        |
| 1136      |                 |        |        |
| 1137      |                 |        |        |
| 1138      |                 |        |        |
| 1139      | GT              |        |        |
| 1140      |                 |        |        |
| 1141      |                 |        |        |
| 1142      |                 |        |        |
| 1143      | Zip             |        |        |
| 1144      |                 |        |        |
| 1145      | GT vocab. ✓     |        |        |
| 1146      | GT alignments ✗ |        |        |
| 1147      | GT mask ✗       |        |        |
| 1148      |                 |        |        |
| 1149      |                 |        |        |
| 1150      | TIDES           |        |        |
| 1151      |                 |        |        |
| 1152      | GT vocab. ✗     |        |        |
| 1153      | GT alignments ✗ |        |        |
| 1154      | GT mask ✗       |        |        |
| 1155      |                 |        |        |
| 1156      |                 |        |        |
| 1157      | TIDES           |        |        |
| 1158      |                 |        |        |
| 1159      | GT vocab. ✓     |        |        |
| 1160      | GT alignments ✗ |        |        |
| 1161      | GT mask ✗       |        |        |
| 1162      |                 |        |        |
| 1163      |                 |        |        |
| 1164      | TIDES           |        |        |
| 1165      |                 |        |        |
| 1166      | GT vocab. ✗     |        |        |
| 1167      | GT alignments ✓ |        |        |
| 1168      | GT mask ✗       |        |        |
| 1169      |                 |        |        |
| 1170      |                 |        |        |
| 1171      | TIDES           |        |        |
| 1172      |                 |        |        |
| 1173      | GT vocab. ✗     |        |        |
| 1174      | GT alignments ✗ |        |        |
| 1175      | GT mask ✓       |        |        |
| 1176      |                 |        |        |
| 1177      |                 |        |        |
| 1178      | TIDES           |        |        |
| 1179      |                 |        |        |
| 1180      | GT vocab. ✓     |        |        |
| 1181      | GT alignments ✓ |        |        |
| 1182      | GT mask ✓       |        |        |
| 1183      |                 |        |        |
| 1184      |                 |        |        |
| 1185      |                 |        |        |

Figure 11: Qualitative results of TIDES, its variants with subcomponents replaced by optimal alternatives, and Zip (Shi & Yang, 2024).

| Sample ID | 475779          | 511321 | 219578 |
|-----------|-----------------|--------|--------|
| 1188      |                 |        |        |
| 1189      |                 |        |        |
| 1190      |                 |        |        |
| 1191      |                 |        |        |
| 1192      | GT              |        |        |
| 1193      |                 |        |        |
| 1194      |                 |        |        |
| 1195      |                 |        |        |
| 1196      |                 |        |        |
| 1197      | Zip             |        |        |
| 1198      | GT vocab. ✓     |        |        |
| 1199      | GT alignments ✗ |        |        |
| 1200      | GT mask ✗       |        |        |
| 1201      |                 |        |        |
| 1202      |                 |        |        |
| 1203      |                 |        |        |
| 1204      | TIDES           |        |        |
| 1205      | GT vocab. ✗     |        |        |
| 1206      | GT alignments ✗ |        |        |
| 1207      | GT mask ✗       |        |        |
| 1208      |                 |        |        |
| 1209      |                 |        |        |
| 1210      |                 |        |        |
| 1211      | TIDES           |        |        |
| 1212      | GT vocab. ✓     |        |        |
| 1213      | GT alignments ✗ |        |        |
| 1214      | GT mask ✗       |        |        |
| 1215      |                 |        |        |
| 1216      |                 |        |        |
| 1217      |                 |        |        |
| 1218      | TIDES           |        |        |
| 1219      | GT vocab. ✗     |        |        |
| 1220      | GT alignments ✓ |        |        |
| 1221      | GT mask ✗       |        |        |
| 1222      |                 |        |        |
| 1223      |                 |        |        |
| 1224      |                 |        |        |
| 1225      | TIDES           |        |        |
| 1226      | GT vocab. ✗     |        |        |
| 1227      | GT alignments ✗ |        |        |
| 1228      | GT mask ✓       |        |        |
| 1229      |                 |        |        |
| 1230      |                 |        |        |
| 1231      |                 |        |        |
| 1232      | TIDES           |        |        |
| 1233      | GT vocab. ✓     |        |        |
| 1234      | GT alignments ✓ |        |        |
| 1235      | GT mask ✓       |        |        |
| 1236      |                 |        |        |
| 1237      |                 |        |        |
| 1238      |                 |        |        |
| 1239      |                 |        |        |

Figure 12: Qualitative results of TIDES, its variants with subcomponents replaced by optimal alternatives, and Zip (Shi & Yang, 2024).

### 1242 A.7.2 EFFECT OF PSM PERFORMANCE ON TIDES

1243  
1244 The first set of figures (Figure 13, 14, and 15) illustrates how different PSMs affect the final segmen-  
1245 tation outputs of TIDES, underscoring the system’s reliance on PSM for robust performance. To  
1246 isolate the impact of the PSM, we use GT class names as prompts and apply the same TF-OVSS  
1247 method (CS (ViT-B/16)) to derive the patch-text alignment scores.

1248 Based on our comprehensive quantitative and qualitative analysis, EfficientViT-SAM is identified  
1249 as the most suitable PSM for TIDES. Given HQ-SAM2.1’s ability to capture fine-grained details,  
1250 this difference needs careful examination. Therefore, we summarize the top three masks produced  
1251 by each PSM in Figure 16, 17, 18, and 19. Our observations reveal that each PSM has distinct  
1252 characteristics that affect the types of masks retained after its postprocessing logic and TIDES’  
1253 instance identification. For example, SAM2.1 tends to generate many masks that span multiple  
1254 objects. This behavior negatively impacts TIDES’ clustering process, often causing incorrect masks  
1255 to be ranked higher than the correct ones. Developing a pipeline that explicitly accounts for the  
1256 implicit characteristics of each PSM presents a promising direction for future work.

1257  
1258  
1259  
1260  
1261  
1262  
1263  
1264  
1265  
1266  
1267  
1268  
1269  
1270  
1271  
1272  
1273  
1274  
1275  
1276  
1277  
1278  
1279  
1280  
1281  
1282  
1283  
1284  
1285  
1286  
1287  
1288  
1289  
1290  
1291  
1292  
1293  
1294  
1295

| Sample ID | 184791                | 238866 | 286994 |
|-----------|-----------------------|--------|--------|
| 1296      |                       |        |        |
| 1297      |                       |        |        |
| 1298      |                       |        |        |
| 1299      |                       |        |        |
| 1300      | GT                    |        |        |
| 1301      |                       |        |        |
| 1302      |                       |        |        |
| 1303      |                       |        |        |
| 1304      |                       |        |        |
| 1305      | TIDES (SAM Huge)      |        |        |
| 1306      | GT vocab. ✓           |        |        |
| 1307      | GT alignments ✗       |        |        |
| 1308      | GT mask ✗             |        |        |
| 1309      |                       |        |        |
| 1310      |                       |        |        |
| 1311      |                       |        |        |
| 1312      | TIDES (E-SAM XL1)     |        |        |
| 1313      | GT vocab. ✓           |        |        |
| 1314      | GT alignments ✗       |        |        |
| 1315      | GT mask ✗             |        |        |
| 1316      |                       |        |        |
| 1317      |                       |        |        |
| 1318      |                       |        |        |
| 1319      | TIDES (M-SAM Tiny)    |        |        |
| 1320      | GT vocab. ✓           |        |        |
| 1321      | GT alignments ✗       |        |        |
| 1322      | GT mask ✗             |        |        |
| 1323      |                       |        |        |
| 1324      |                       |        |        |
| 1325      |                       |        |        |
| 1326      | TIDES (SAM2 Large)    |        |        |
| 1327      | GT vocab. ✓           |        |        |
| 1328      | GT alignments ✗       |        |        |
| 1329      | GT mask ✗             |        |        |
| 1330      |                       |        |        |
| 1331      |                       |        |        |
| 1332      |                       |        |        |
| 1333      | TIDES (HQ-SAM2 Large) |        |        |
| 1334      | GT vocab. ✓           |        |        |
| 1335      | GT alignments ✗       |        |        |
| 1336      | GT mask ✗             |        |        |
| 1337      |                       |        |        |
| 1338      |                       |        |        |
| 1339      |                       |        |        |
| 1340      | Zip (SAM Base)        |        |        |
| 1341      | GT vocab. ✓           |        |        |
| 1342      | GT alignments ✗       |        |        |
| 1343      | GT mask ✗             |        |        |
| 1344      |                       |        |        |
| 1345      |                       |        |        |
| 1346      |                       |        |        |
| 1347      |                       |        |        |

Figure 13: Difference in TIDES performance across underlying PSMs, along with Zip (Shi & Yang, 2024).

| Sample ID | 181666                | 289393 | 463730 |
|-----------|-----------------------|--------|--------|
| 1350      |                       |        |        |
| 1351      |                       |        |        |
| 1352      |                       |        |        |
| 1353      |                       |        |        |
| 1354      | GT                    |        |        |
| 1355      |                       |        |        |
| 1356      |                       |        |        |
| 1357      |                       |        |        |
| 1358      |                       |        |        |
| 1359      | TIDES (SAM Huge)      |        |        |
| 1360      |                       |        |        |
| 1361      | GT vocab. ✓           |        |        |
| 1362      | GT alignments ✗       |        |        |
| 1363      | GT mask ✗             |        |        |
| 1364      |                       |        |        |
| 1365      |                       |        |        |
| 1366      | TIDES (E-SAM XL1)     |        |        |
| 1367      |                       |        |        |
| 1368      | GT vocab. ✓           |        |        |
| 1369      | GT alignments ✗       |        |        |
| 1370      | GT mask ✗             |        |        |
| 1371      |                       |        |        |
| 1372      |                       |        |        |
| 1373      | TIDES (M-SAM Tiny)    |        |        |
| 1374      |                       |        |        |
| 1375      | GT vocab. ✓           |        |        |
| 1376      | GT alignments ✗       |        |        |
| 1377      | GT mask ✗             |        |        |
| 1378      |                       |        |        |
| 1379      |                       |        |        |
| 1380      | TIDES (SAM2 Large)    |        |        |
| 1381      |                       |        |        |
| 1382      | GT vocab. ✓           |        |        |
| 1383      | GT alignments ✗       |        |        |
| 1384      | GT mask ✗             |        |        |
| 1385      |                       |        |        |
| 1386      |                       |        |        |
| 1387      | TIDES (HQ-SAM2 Large) |        |        |
| 1388      |                       |        |        |
| 1389      | GT vocab. ✓           |        |        |
| 1390      | GT alignments ✗       |        |        |
| 1391      | GT mask ✗             |        |        |
| 1392      |                       |        |        |
| 1393      |                       |        |        |
| 1394      | Zip (SAM Base)        |        |        |
| 1395      |                       |        |        |
| 1396      | GT vocab. ✓           |        |        |
| 1397      | GT alignments ✗       |        |        |
| 1398      | GT mask ✗             |        |        |
| 1399      |                       |        |        |
| 1400      |                       |        |        |
| 1401      |                       |        |        |

Figure 14: Difference in TIDES performance across underlying PSMs, along with Zip (Shi & Yang, 2024).

1404  
 1405  
 1406  
 1407  
 1408  
 1409  
 1410  
 1411  
 1412  
 1413  
 1414  
 1415  
 1416  
 1417  
 1418  
 1419  
 1420  
 1421  
 1422  
 1423  
 1424  
 1425  
 1426  
 1427  
 1428  
 1429  
 1430  
 1431  
 1432  
 1433  
 1434  
 1435  
 1436  
 1437  
 1438  
 1439  
 1440  
 1441  
 1442  
 1443  
 1444  
 1445  
 1446  
 1447  
 1448  
 1449  
 1450  
 1451  
 1452  
 1453  
 1454  
 1455  
 1456  
 1457

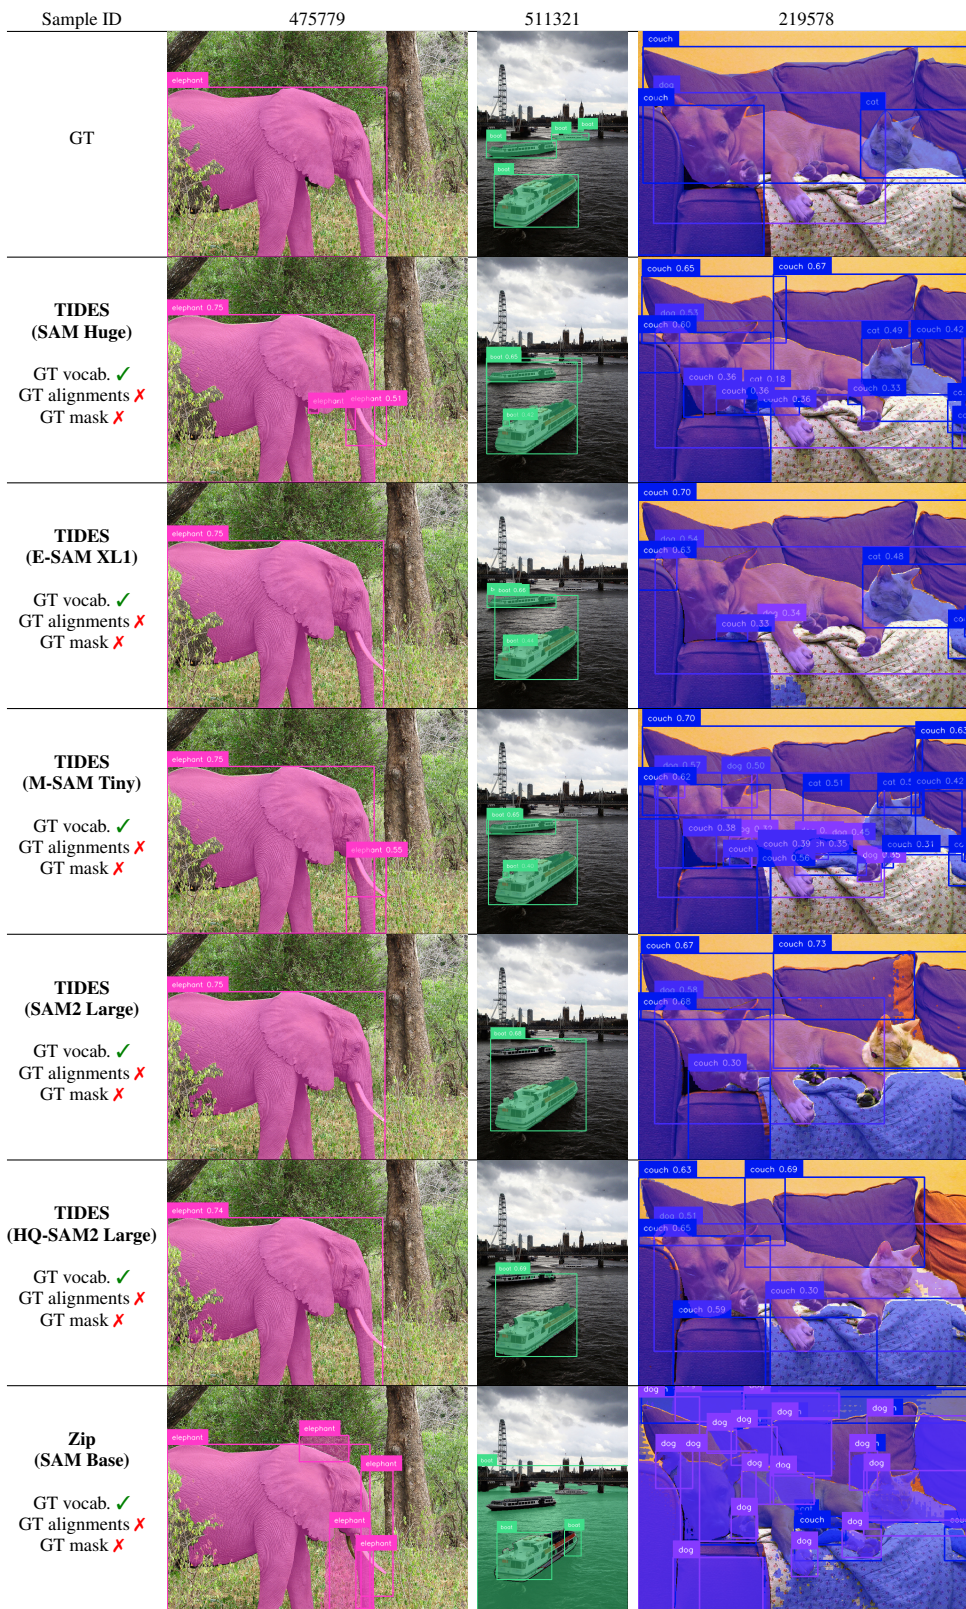

Figure 15: Difference in TIDES performance across underlying PSMs, along with Zip (Shi & Yang, 2024).

1458  
 1459  
 1460  
 1461  
 1462  
 1463  
 1464  
 1465  
 1466  
 1467  
 1468  
 1469  
 1470  
 1471  
 1472  
 1473  
 1474  
 1475  
 1476  
 1477  
 1478  
 1479  
 1480  
 1481  
 1482  
 1483  
 1484  
 1485  
 1486  
 1487  
 1488  
 1489  
 1490  
 1491  
 1492  
 1493  
 1494  
 1495  
 1496  
 1497  
 1498  
 1499  
 1500  
 1501  
 1502  
 1503  
 1504  
 1505  
 1506  
 1507  
 1508  
 1509  
 1510  
 1511

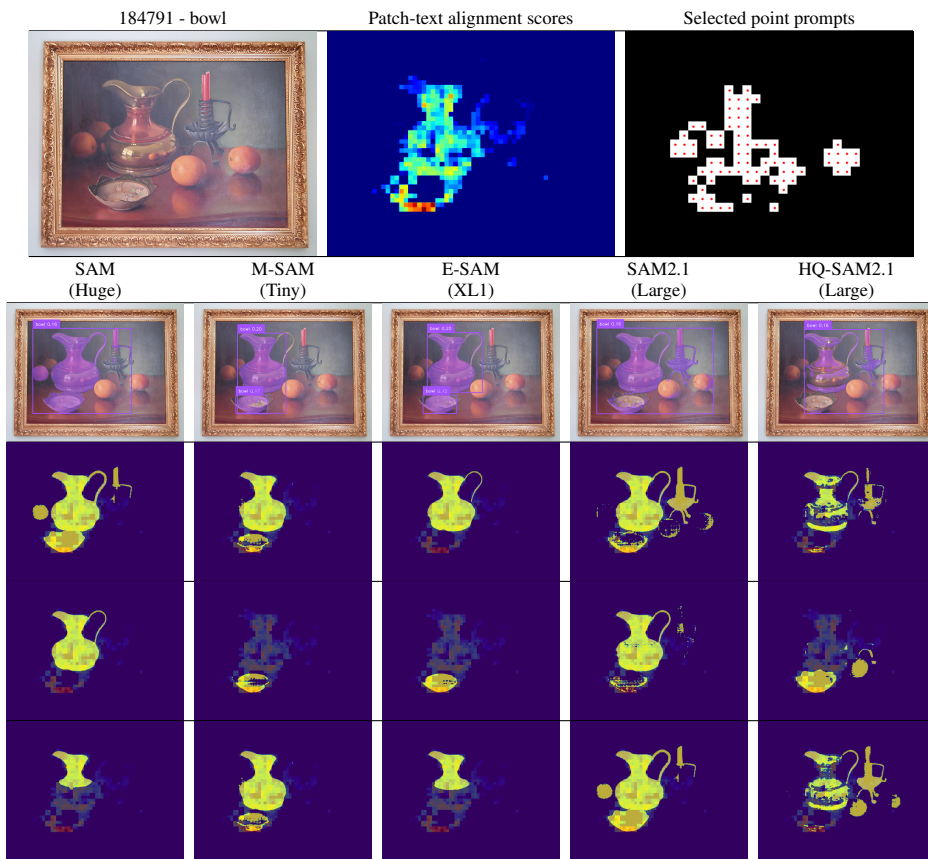

Figure 16: Patch-text alignment scores derived by CS (Li et al., 2025), selected point prompts, and PSM predictions corresponding to the top three TIDES predictions for different PSM.

1512  
 1513  
 1514  
 1515  
 1516  
 1517  
 1518  
 1519  
 1520  
 1521  
 1522  
 1523  
 1524  
 1525  
 1526  
 1527  
 1528  
 1529  
 1530  
 1531  
 1532  
 1533  
 1534  
 1535  
 1536  
 1537  
 1538  
 1539  
 1540  
 1541  
 1542  
 1543  
 1544  
 1545  
 1546  
 1547  
 1548  
 1549  
 1550  
 1551  
 1552  
 1553  
 1554  
 1555  
 1556  
 1557  
 1558  
 1559  
 1560  
 1561  
 1562  
 1563  
 1564  
 1565

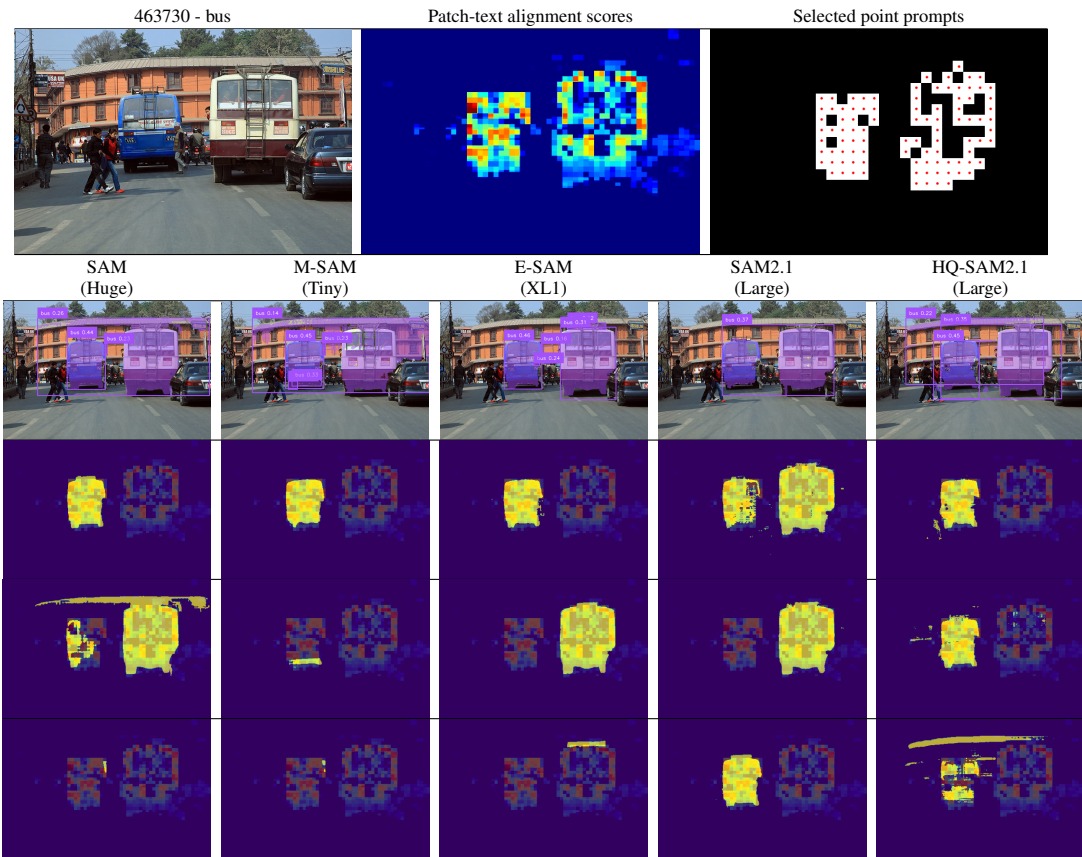

Figure 17: Patch-text alignment scores derived by CS (Li et al., 2025), selected point prompts, and PSM predictions corresponding to the top three TIDES predictions for different PSM.

1566  
 1567  
 1568  
 1569  
 1570  
 1571  
 1572  
 1573  
 1574  
 1575  
 1576  
 1577  
 1578  
 1579  
 1580  
 1581  
 1582  
 1583  
 1584  
 1585  
 1586  
 1587  
 1588  
 1589  
 1590  
 1591  
 1592  
 1593  
 1594  
 1595  
 1596  
 1597  
 1598  
 1599  
 1600  
 1601  
 1602  
 1603  
 1604  
 1605  
 1606  
 1607  
 1608  
 1609  
 1610  
 1611  
 1612  
 1613  
 1614  
 1615  
 1616  
 1617  
 1618  
 1619

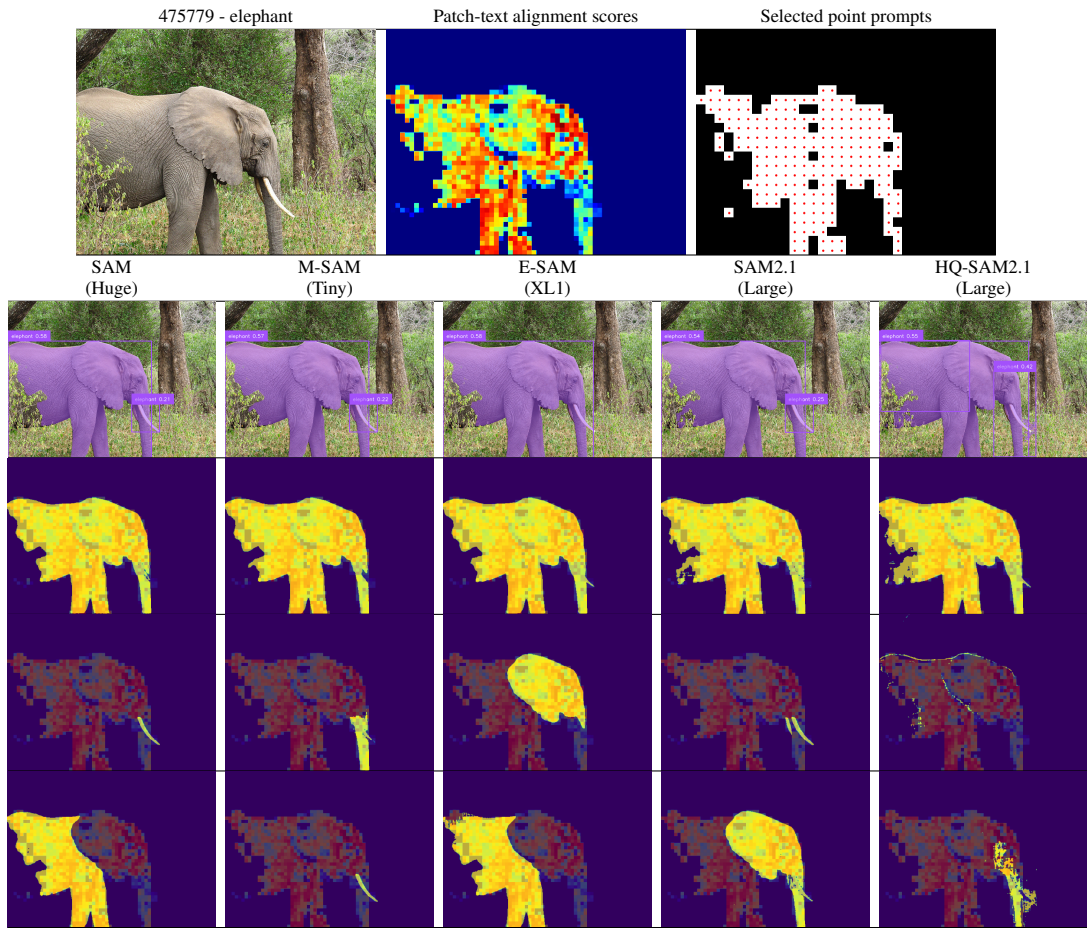

Figure 18: Patch-text alignment scores derived by CS (Li et al., 2025), selected point prompts, and PSM predictions corresponding to the top three TIDES predictions for different PSM.

1620  
 1621  
 1622  
 1623  
 1624  
 1625  
 1626  
 1627  
 1628  
 1629  
 1630  
 1631  
 1632  
 1633  
 1634  
 1635  
 1636  
 1637  
 1638  
 1639  
 1640  
 1641  
 1642  
 1643  
 1644  
 1645  
 1646  
 1647  
 1648  
 1649  
 1650  
 1651  
 1652  
 1653  
 1654  
 1655  
 1656  
 1657  
 1658  
 1659  
 1660  
 1661  
 1662  
 1663  
 1664  
 1665  
 1666  
 1667  
 1668  
 1669  
 1670  
 1671  
 1672  
 1673

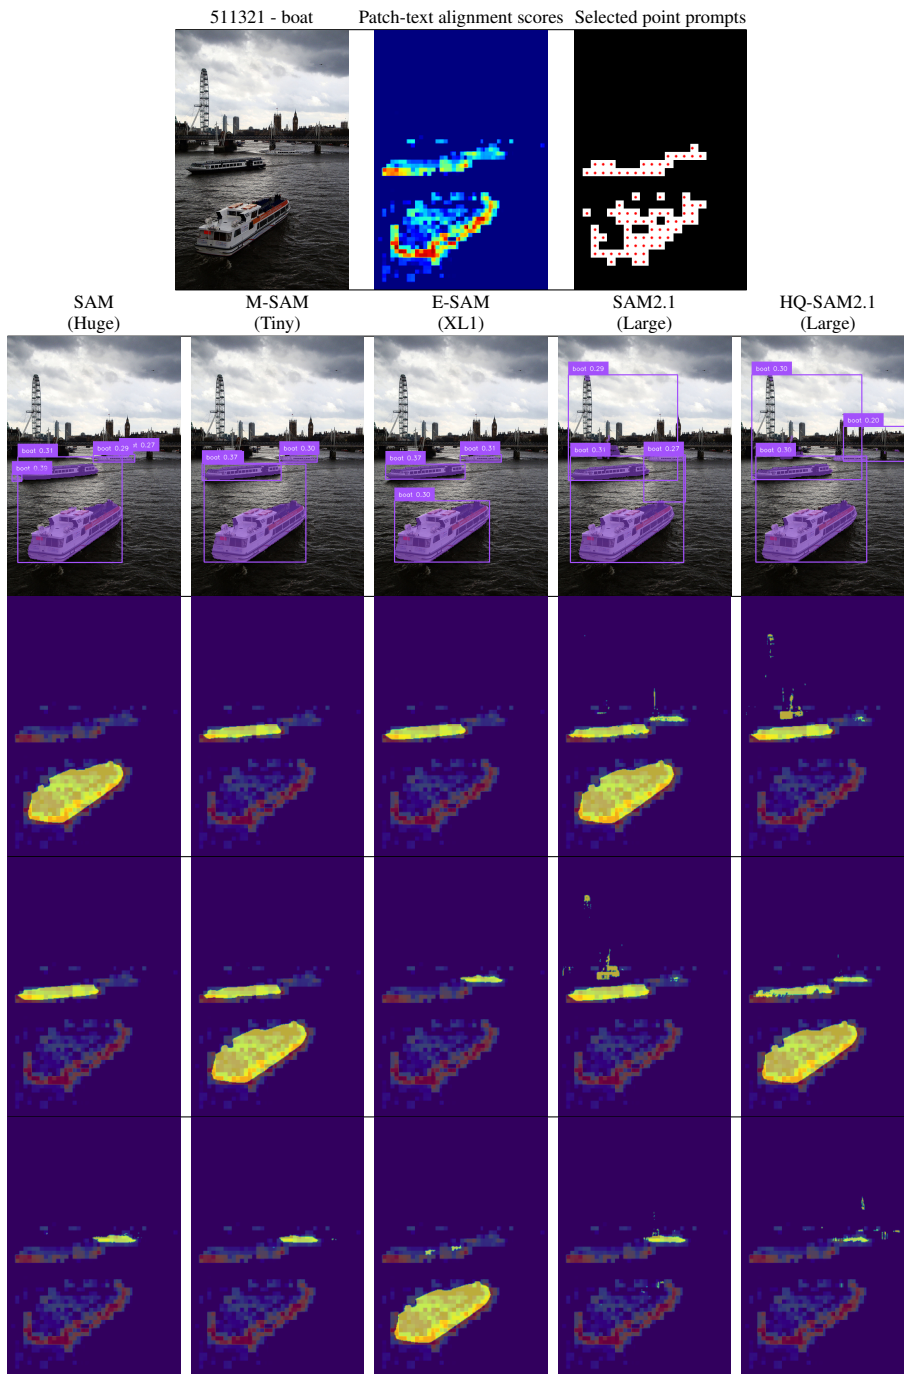

Figure 19: Patch-text alignment scores derived by CS (Li et al., 2025), selected point prompts, and PSM predictions corresponding to the top three TIDES predictions for different PSM.
